# Supplementary material
Source: publisher site journal article supplement (https://www.dovepress.com/get_supplementary_file.php?f=314940.docx)
Supplement: Supplementary file 1 [file get_supplementary_file.php]

**Table S1.** Comparison of oxidative stress biomarkers between tumour tissue and normal adjacent mucosa.

| **Parameter** | **Non-tumour vs tumour tissue** | | **p-value** |
| --- | --- | --- | --- |
| **FRAP** | 0.131  (0.087-0.185) | 0.153  (0.121-0.238) | ***0.0032*** |
| **PC** | 13.25  (2.363-27.50) | 32.41  (10.64-57.18) | ***<0.0001*** |
| **Total thiols** | 9.201  (6.336-14.42) | 3.905  (1.398-9.116) | ***<0.0001*** |
| **IMA** | 0.550  (0.454-0.670) | 0.612  (0.488-0.872) | ***0.0007*** |
| **Tryptophan** | 19.68  (12.68-30.15) | 14.99  (11.20-21.21) | ***<0.0001*** |
| **Kynurenine** | 0.540  (0.310-0.984) | 0.737  (0.474-1.281) | ***<0.0001*** |
| **N-formylkynurenine** | 0.202  (0.126-0.309) | 0.270  (0.191-0.427) | ***<0.0001*** |
| **Dityrosine** | 0.823  (0.257-1.591) | 1.455  (0.615-2.532) | ***<0.0001*** |
| **Amadori products** | 50.99  (31.88-78.56) | 65.86  (38.69-80.14) | ***0.0038*** |
| **AGE** | 0.608  (0.257-1.018) | 0.907  (0.541-1.471) | ***<0.0001*** |
| **8-OHDG** | 0.823  (0.516-1.438) | 1.083  (0.704-1.684) | ***<0.0001*** |
| **MPO** | 9.996  (6.39-13.86) | 15.99  (9.70-21.78) | ***<0.0001*** |
| **NO** | 20.39  (9.572-35.85) | 41.38  (23.89-72.28) | ***<0.0001*** |
| **Peroxynitrite** | 4.557  (1.128-8.237) | 6.329  (3.111-12.49) | ***<0.0009*** |
| **S-nitrosothiols** | 5.565  (4.609-7.565) | 5.826  (4.696-8.957) | 0.1684 |
| **Nitrotyrosine** | 62.59  (31.59-85.80) | 76.06  (57.84-115.4) | ***0.0004*** |

**Legends:** FRAP – ferric reducing antioxidant power, PC – protein carbonyls, IMA – ischemia modified albumin, AGE - advanced glycation end products, 8-OHDG - 8-hydroxydeoxyguanosine, MPO - myeloperoxidase, NO -nitric oxide. Bold and red text shows statistical significance

**Table S2.** Oxidative and nitrosative stress biomarkers in relation to clinical-pathological parameters.

| **Parameter** | **Left-side vs right-side** | | **adenocarcinoma vs mucinous adenocarcinoma** | | **T2 vs T3 (depth of invasion)** | | **N0 vs N1+N2**  **(lymph node metastasis)** | | **M0 vs M1 (distant metastasis)** | | **Stage at diagnosis**  **- I+II vs III+IV** | | **Present vs absent vascular invasion** | **Present vs absent neural invasion** | **Inflammatory infiltration in the invasive front:**  **absent and weak**  **vs moderate**  **and strong** | **Inflammatory infiltration in the tumor center:**  **absent**  **and weak**  **vs moderate**  **and strong** | **Low budding vs intermediate and high budding** |
| --- | --- | --- | --- | --- | --- | --- | --- | --- | --- | --- | --- | --- | --- | --- | --- | --- | --- |
| Non-tumour | Tumour | Non-tumour | Tumour | Non-tumour | Tumour | Non-tumour | Tumour | Non-tumour | Tumour | Non-tumour | Tumour | Tumour | Tumour | Tumour | Tumour | Tumour |
| **FRAP** | p=0.6836  0.1306 (0.0952-0.1712) vs 0.1379 (0.0869-0.1854) | p=0.0605  0.1409 (0.1210-0.2277) vs 0.1592 (0.1272-0.2381) | p=0.9770  0.1323 (0.0869-0.1854) vs 0.1307 (0.1264-0.1474) | p=0.9775  0.1536 (0.1210-0.2381) vs 0.1520 (0.1279-0.2277) | p=0.8008  0.1306 (0.1120-0.1712) vs 0.1333 (0.0869-0.1854) | p=0.8008  0.1536 (0.1279-0.2277) vs 0.1520 (0.1210-0.2381) | p=0.9821  0.1306 (0.0896-0.1854) vs 0.1418 (0.0952-0.1675) | p=0.4860  0.1536 (0.1279-0.2277) vs 0.1520 (0.1210-0.2381) | p=0.8579  0.1323 (0.0870-0.1854) vs 0.1305 (0.1145-0.1529) | p=0.8021  0.1536 (0.1210-0.2381) vs 0.1442 (0.1308-0.1985) | p=0.6468  0.1307 (0.0869-0.1854) vs 0.1323 (0.0952-0.1675) | p=0.4450  0.1481 (0.1210-0.2381) vs 0.1537 (0.1279-0.2277) | p=0.9823  0.1579 (0.1259-0.2277) vs 0.1528 (0.1210-0.2381) | p=0.6712  0.1536 (0.1308-0.2381) vs 0.1442 (0.1259-0.2277) | p=0.6784  vs 0.1442 (0.1279-0.2277) s 0.1579 (0.1210-0.2117) | p=0.1533  0.1662 (0.1210-0.2381) vs 0.1442 (0.1272-0.2277) | p=0.2793  0.1620 (0.1279-0.2381) vs 0.1456 (0.1210-0.2277) |
| **PC** | p=0.4642  12.95 (8.817-23.00) vs 13.84 (12.36-17.82) | p=0.3374  32.41 (18.91-52.36) vs 43.13 (22.18-56.36) | p=0.3603  13.82 (8.817-35.09) vs 24.18 (13.27-35.09) | p=0.6504  31.36 (18.91-56.56) vs 37.52 (22.18-52.36) | p=0.8670  13.23 (2.363-37.50) vs 13.27 (2.363-35.09) | ***p=0.0077***  23.72 (14.64-42.36) vs 35.18 (18.91-56.36) | p=0.4004  13.25 (2.363-35.09) vs 17.38 (2.363-35.09) | p=0.1551  28.72 (22.18-37.91) vs 43.40 (18.91-56.36) | p=0.1313  32.41 (18.91-47.00) vs 43.13 (31.36-52.36) | p=0.0162  14.41 (8.817-23.00) vs 26.95 (15.13-35.09) | p=0.1186  13.18 (7.317-19.68) vs 15.09 (2.363-23.00) | p=0.1539  32.41 (10.64-57.18) vs 43.13 (26.59-54.32) | ***p=0.01***  43.68 (31.36-56.36) vs 25.20 (22.18-37.91) | p=0.1169  45.64 (31.36-56.36) vs 32.41 (22.18-47.00) | p=0.2884  27.54 (18.91-47.00) vs 32.41 (22.18-56.36) | ***p=0.0276***  24.02 (18.91-37.91) vs 43.13 (22.18-56.36) | p=0.0489  24.32 (18.91-43.68) vs 37.79 (26.09-56.36) |
| **Total thiols** | p=0.7533  9.116 (8.175-12.49) vs 10.65 (7.790-13.48) | ***p=0.0222***  3.831 (2.707-6.892) vs 8.398 (5.500-10.70) | p=0.7929  10.65 (7.790-13.48) vs 10.06 (8.645-10.70) | ***p=0.0010***  3.862 (2.707-5.764) vs 6.892 (5.987-7.240) | p=0.9150  9.265 (6.336-23.48) vs 10.65 (7.790-12.49) | p=0.4260  3.959 (2.151-9.116) vs 3.498 (1.398-6.764) | p=0.9429  9.415 (8.645-23.48) vs 10.68 (7.790-12.49) | p=0.5167  3.697 (1.398-6.764) vs 3.971 (2.707-7.240) | p=0.1483  3.862 (1.398-6.892) vs 5.328 (4.707-6.240) | p=0.0295  9.415 (7.790-11.08) vs 11.08 (9.415-13.48) | p=0.4576  9.116 (6.336-12.42) vs 10.10 (7.790-12.49) | p=0.9706  3.905 (2.151-9.116) vs 4.596 (2.398-6.674) | p=0.0635  6.764 (3.398-7.240) vs 3.498 (2.707-3.791) | p=0.8889  5.500 (2.707-7.240) vs 3.831 (3.691-3.971) | p=0.2571  5.370 (3.691-6.674) vs 6.645 (3.306-7.240) | p=0.2857  3.691 (1.398-6.764) vs 5.431 (3.306-7.240) | p=0.4127  3.691 (1.398-6.892) vs 5.367 (3.306-7.240) |
| **IMA** | p=0.8571  0.5270 (0.4810-0.5680) vs 0.5535 (0.5080-0.5670) | p=0.6304  0.6395 (0.5730-0.7040) vs 0.6585 (0.5570-0.7770) | p=0.5565  0.5620 (0.4810-0.5730) vs 0.5590 (0.5450-0.5730) | p=0.5854  0.6210 (0.488-0.779) vs 0.5970 (0.521-0.704) | p=0.6642  0.5375 (0.4540-0.6700) vs 0.5645 (0.5270-0.5730) | p=0.7221  0.5990 (0.4880-0.7790) vs 0.6090 (0.5210-0.7770) | p=0.1400  0.5270 (0.4810-0.5730) vs 0.5675 (0.5620-0.5730) | p=0.0381  0.5570 (0.4880-0.7040) vs 0.7045 (0.6080-0.7790) | p=0.5611  0.5970 (0.5570-0.7710) vs 0.6240 (0.4880-0.7790) | p=0.1735  0.5360 (0.4810-0.5680) vs 0.5700 (0.5210-0.5780) | p=0.1790  0.5320 (0.4540-0.6800) vs 0.5680 (0.5270-0.5840) | p=0.1921  0.5970 (0.4880-0.7790) vs 0.6380 (0.5210-0.8720) | p=0.1488  0.6930 (0.5210-0.7790) vs 0.6025 (0.5210-0.7710) | p=0.2224  0.7710 (0.5210-0.7790) vs 0.6080 (0.5210-0.7740) | p=0.1481  0.5655 (0.5210-0.6820) vs 0.6710 (0.5570-0.7790) | p=0.8726  0.6240 (0.5210-0.7710) vs 0.6505 (0.5210-0.7790) | p=0.3939  0.6240 (0.5210-0.7040) vs 0.7010 (0.5570-0.7790) |
| **Tryptophan** | p=0.7920  15.62 (11.20-21.21) vs 14.64 (11.33-19.66) | ***p=0.0416***  20.76 (14.29-30.15) vs 17.82 (13.48-23.76) | p=0.2602  15.38 (11.33-21.21) vs 14.25 (11.20-16.24) | p=0.2855  19.79 (12.68-30.15) vs 17.19 (14.57-19.91) | p=0.4220  15.71 (11.52-21.21) vs 14.25 (11.20-19.66) | p=0.5059  18.64 (12.68-28.33) vs 19.83 (13.48-30.15) | p=0.8822  15.16 (11.20-21.21) vs 14.07 (11.94-19.02) | p=0.9831  20.76 (12.68-30.15) vs 18.90 (14.44-28.34) | p=0.5427  16.24 (13.00-19.02) vs 14.99 (11.20-21.21) | p=0.8021  19.29 (12.68-30.15) vs 19.60 (18.97-21.61) | p=0.8103  14.99 (11.20-21.21) vs 14.84 (11.94-19.02) | p=0.7767  19.83 (12.68-30.15) vs 18.68 (14.44-28.34) vs | ***p=0.0005***  13.26 (12.68-20.90) vs 22.70 (16.24-30.15) | p=0.6712  18.97 (13.48-30.15) vs 19.75 (14.29-28.34) | ***p=0.0043***  22.93 (14.29-28.34) vs 18.68 (14.20-20.90) | ***p=0.0476***  21.61 (14.20-.30.15) vs 18.46 (14.44-19.91) | p=0.5102  19.83 (14.29-30.15) vs 18.97 (13.48-28.34) |
| **Kynurenine** | p=0.5490  0.5142 (0.3099-0.9840) vs 0.5351 (0.3622-0.9246) | p=0.8667  0.7367 (0.4738-1.199) vs 0.7734 (0.4982-1.281) | p=0.7950  0.5351 (0.3099-0.9246) vs 0.5178 (0.4932-0.9840) | p=0.4025  0.7367 (0.4738-1.281) vs 0.6697 (0.4982-1.131) | p=0.9451  0.5381 (0.3099-0.9840) vs 0.5349 (0.3215-0.9246) | p=0.1759  0.6769 (0.4738-1.281) vs 0.7408 (0.5296-1.199) | p=0.7360  0.5264 (0.3099-0.9840) vs 0.5354 (0.3215-0.7297) | p=0.8750  0.7413 (0.4738-1.281) vs 0.6899 (0.5296-1.131) | p=0.2374  0.5279 (0.3099-0.9840) vs 0.7297 (0.4943-0.8837) | p=0.7473  0.7367 (0.4738-1.281) vs 0.6795 (0.6044-0.9568) | p=0.8443  0.5178 (0.3099-0.9840) vs 0.5408 (0.3215-0.8837) | p=0.8443  0.7418 (0.4738-1.281) vs 0.6846 (0.5296-1.143) | p=0.1631  0.8887 (0.4738-1.281) vs 0.6899 (0.4982-1.131) | ***p=0.0259***  0.8745 (0.4738-1.281) vs 0.6722 (0.4982-0.7408) | p=0.2894  0.7418 (0.4738-1.199) vs 0.6795 (0.4982-1.281) | p=0.9548  0.7408 (0.4738-1.143) vs 0.7327 (0.4982-1.281) | p=0.8878  0.8745 (0.4738-1.143) vs 0.6899 (0.4982-1.281) |
| **N-formylkynurenine** | p=0.4574  0.2023 (0.1256-0.2823) vs 0.2069 (0.1495-0.3093) | p=0.3257  0.2513 (0.1952-0.3311) vs 0.2704 (0.1909-0.4267) | p=0.9770  0.2023 (0.1256-0.3093) vs 0.2050 (0.1652-0.2731) | p=0.2602  0.2732 (0.1909-0.4267) vs 0.2474 (0.2083-0.3311) | p=0.8724  0.1944 (0.1727-0.3093) vs 0.2075 (0.1256-0.2897) | p=0.9087  0.2613 (0.1952-0.3982) vs 0.2729 (0.1909-0.4267) | p=0.1223  0.2081 (0.1256-0.3093) vs 0.1799 (0.1495-0.2897) | p=0.8159  0.2669 (0.1952-0.4267) vs 0.2790 (0.1909-0.3492) | p=0.1852  0.2023 (0.1256-0.3093) vs 0.2641 (0.1834-0.2823) | p=0.1841  0.2702 (0.1952-0.4267) vs 0.2309 (0.1909-0.2735) | p=0.4715  0.2075 (0.1256-0.3093) vs 0.1843 (0.1495-0.2897) | p=0.7434  0.2663 (0.1952-0.3982) vs 0.2732 (0.1909-0.4267) | p=0.6740  0.2735 (0.2024-0.3407) vs 0.2589 (0.1952-0.3509) | p=0.2431  0.2735 (0.1909-0.4267) vs 0.2551 (0.2024-0.3013) | p=0.4896  0.2674 (0.1909-0.4267) vs 0.2551 (0.1952-0.3492) | p=0.1533  0.2729 (0.1909-0.4267) vs 0.2503 (0.1952-0.3311) | p=0.7778  0.2674 (0.1909-0.4267) vs 0.2663 (0.1952-0.3218) |
| **Dityrosine** | p=0.4289  0.8197 (0.2601-1.303) vs 0.9543 (0.2810-1.774) | p=0.1386  1.299 (0.743-1.874) vs 1.770 (0.729-2.718) | p=0.8852  0.8229 (0.2810-1.441) vs 1.063 (0.2601-1.774) | p=0.2145  1.705 (0.474-2.718) vs 1.298 (0.744-1.697) | p=0.9817  0.8228 (0.281-1.774) vs 0.8452 (0.260-1.441) | p=0.6300  1.409 (0.474-2.718) vs 1.389 (0.729-2.380) | p=0.9821  0.8229 (0.2810-1.774) vs 0.8452 (0.2601-1.441) | p=0.4315  1.697 (0.474-2.718) vs 1.339 (0.729-2.353) | p=0.5427  0.8229 (0.2601-1.774) vs 1.129 (0.4691-1.303) | p=0.6416  1.543 (0.4741-2.718) vs 0.9115 (0.8294-2.348) | p=0.7107  0.8198 (0.2810-1.774) vs 0.8593 (0.2601-1.441) | p=0.9478  1.697 (0.474-2.718) vs 1.364 (0.729-2.380) | p=0.6420  1.315 (0.729-2.353)  vs 1.301 (0.717-1.954) | ***p=0.038***  1.770 (0.8294-2.718) vs 0.9862 (0.7297-1.697) | p=0.8178  1.389 (0.729-2.718) vs 1.339 (0.474-2.348) | p=0.2136  1.697 (0.8124-2.718) vs 1.298 (0.474-2.348) | p=0.9625  1.298 (0.7439-2.718) vs 1.389 (0.4741-2.348) |
| **Amadori products** | p=0.6905  47.39 (31.88-78.56) vs 55.30 (37.58-62.97) | p=0.3374  62.50 (39.40-68.12) vs 66.85 (52.06-75.55) | p=0.4292  52.06 (31.88-78.56) vs 44.82 (37.58-52.06) | p=0.1127  66.85 (42.48-80.14) vs 58.66 (39.40-66.53) | p=0.1510  58.54 (36.79-78.56) vs 49.92 (31.88-62.97) | p=0.3456  68.20 (38.69-80.14) vs 64.64 (39.40-71.52) | p=0.6678  52.06 (37.58-78.56) vs 50.99 (31.88-62.97) | p=0.6642  66.69 (39.40-80.14) vs 64.64 (54.75-70.25) | p=0.8689  62.01 (39.40-80.14) vs 63.51 (52.06-75.55) | p=0.0028  48.89 (31.88-58.47) vs 62.06 (58.94-78.56) | p=0.5370  49.92 (31.88-67.09) vs 54.55 (32.28-78.56) | p=0.8961  62.74 (38.69-80.14) vs 65.19 (54.75-50.25) | ***p=0.0449***  68.12 (58.75-80.14) vs 58.66 (39.40-66.85) | p=0.2478  66.81 (39.40-80.14) vs 58.94 (54.75-66.53) | ***p=0.0386***  58.94 (54.75-66.67) vs 68.12 (58.39-80.14) | p=0.2467  62.50 (39.40-68.12) vs 68.39 (56.65-80.14) | ***p=0.0095***  57.52 (39.40-66.85) vs 68.12 (58.94-80.14) |
| **AGE** | p=0.1718  0.5310 (0.2566-0.9287) vs 0.6272 (0.4219-1.018) | ***p=0.0307***  0.7868 (0.5409-1.108) vs 1.031 (0.6106-1.471) | p=0.8852  0.6079  (0.2566-1.018) vs 0.6474 (0.4350-0.9955) | ***p=0.046***  0.9791 (0.6106-1.471) vs 0.6144 (0.5409-1.165) | p=0.2610  0.5660 (0.3357-0.9287) vs 0.6439 (0.2566-1.018) | p=0.9451  0.9688 (0.5409-1.471) vs 0.8911 (0.6106-1.431) | p=0.9831  0.6079 (0.3357-1.018) vs 0.6197 (0.2566-0.9955) | p=0.4849  1.031 (0.5409-1.471) vs 0.8337 (0.6936-1.252) | p=0.6415  0.6079 (0.2566-1.018) vs 0.8099 (0.4664-0.8223) | ***p=0.02***  0.8711 (0.5466-1.165) vs 1.252 (1.114-1.431) | p=0.8443  0,6052 (0.3357-1.018) vs 0.6450 (0.2566-0.9955) | p=0.5268  1,083 (0.541-1.471) vs 0.834 (0.614-1.431) | ***p=0.0057***  1.117 (0.6144-1.471) vs 0.7719 (0.5409-1.108) | ***p=0.0093***  1.083 (0.5466-1.971) vs 0.6936 (0.5409-0.9790) | p=0.5493  0.8911 (0.6106-1.471) vs 0.8231 (0.5409-1.431) | p=0.8178  0.8512 (0.6106-1.471) vs 0.9790 (0.5409-1.431) | p=0.9625  0.8911 (0.5466-1.471) vs 0.8512 (0.5409-1.431) |
| **8-OHDG** | p=0.1264  0.771 (0.515-0.971) vs 0.845 (0.674-1.285) | ***p=0.0099***  0.964 (0.704-1.224) vs 1.152 (0.856-1.684) | p=0.931  0.80 (0.54-  1.40) vs 0.82 (0.73-  0.93) | ***p<0.05***  1.12 (0.73-  1.62) vs 0.96 (0.75-  1.11) | p=0.766  0.81 (0.73-  0.97) vs 0.87 (0.52-  1.44) | p=0.136  1.022 (0.75-  1.15) vs 1.15 (0.70-  1.68) | p=0.271  0.85 (0.65-  1.44) vs 0.78 (0.52-  0.97) | p=0.458  1.04 (0.75-  1.40) vs 1.15 (0.70-  1.68) | p=0.371  0.81 (0.63-1.11) vs 0.97 (0.73-1.29) | p=0.543  1.07 (0.75-1.40) vs 1.12 (0.97-1.45) | p=0.305  0.867 (0.654-1.438) vs 0.776 (0.630-1.285) | p=0.718  1.023 (0.747-1.400) vs 1.101 (0.704-1.446) | p=0.912  1.04 (0.80-1.68) vs 1.11 (0.70-1.45) | p=0.429  1.09 (0.82-1.45) vs 0.97 (0.70-1.40) | p=0.169  1.14 (0.70-1.45) vs 1.02 (0.75-1.68) | p=0.181  1.14 (0.70-1.68) vs 1.02 (0.75-1.22) | p=0.808  1.07 (0.70-1.68) vs 1.12 (0.75-1.40) |
| **MPO** | p=0.1718  9.835 (6.392-11.35) vs 11.32 (6.469-13.86) | ***p=0.0370***  13.91 (9.704-20.94) vs 16.62 (10.72-21.78) | p=0.9770  9.971 (6.392-13.86) vs 9.889 (9.779-11.11) | ***p=0.009***  16.16 (9.704-21.78) vs 14.21 (11.48-16.38) | p=0.2240  9.805 (6.469-11.59) vs 10.65 (6.392-13.86) | p=0.6629  16.10 (11.48-20.94) vs 15.95 (9.704-21.78) | p=0.4091  10.22 (6.469-13.86) vs 9.648 (6.392-13.14) | p=0.1932  16.16 (10.72-21.78) vs 15.66 (9.704-19.19) | p=0.2374  9.864 (6.392-13.86) vs 11.74 (9.779-12.61) | p=0.8579  15.99 (9.704-20.94) vs 15.28 (14.21-21.78) | p=0.3261  10.54 (6.469-13.86) vs 9.515 (6.392-13.14) | p=0.9131  16.02 (10.72-20.94) vs 15.66 (9.704-21.78) | p=0.1303  16.66 (10.72-21.78) vs 15.59 (9.704-19.53) | p=0.3134  15.95 (9.704-21.78) vs 14.21 (11.48-17.83) | p=0.8538  15.95 (12.42-19.53) vs 15.70 (9.704-21.78) | p=0.8538  15.95 (9.704-19.53) vs 15.70 (10.72-21.78) | p=0.9625  15.92 (13.41-19.53) vs 15.95 (9.704-21.78) |
| **NO** | p=0.3358  20.90 (18.39-31.36) vs 26.60 (13.32-32.88) | p=0.1031  33.41 (16.90-52.57) vs 41.38 (31.39-74.83) | p=0.5532  19.39 (9.572-32.38) vs 24.89 (16.90-32.88) | p=0.9547  49.41 (23.89-74.83) vs 42.91 (33.38-112.3) | p=0.6164  19.39 (10.40-55.85) vs 18.39 (9.572-32.88) | p=0.2551  39.89 (23.89-72.33) vs 54.48 (30.88-112.3) | p=0.4744  17.65 (11.40-32.38) vs 20.39 (9.572-32.88) | p=0.2227  34.39 (23.89-58.38) vs 52.57 (30.88-74.83) | p=0.1586  34.39 (16.90-61.84) vs 56.39 (30.88-74.83) | p=0.028  18.39 (9.572-21.84) vs 32.63 (26.33-33.38) | p=0.6142  17.36 (9.572-33.85) vs 20.39 (11.40-32.38) | p=0.0022  39.89 (23.89-62.34) vs 60.88 (38.91-94.83) | ***p=0.0080***  60.11 (49.41-82.3) vs 33.41 (23.89-56.39) | ***p=0.0190***  58.38 (43.38-64.38) vs 35.37 (23.89-56.39) | ***p=0.047***  35.37 (23.89-52.57) vs 57.39 (30.88-74.83) | p=0.5338  33.39 (23.88-58.38) vs 42.39 (30.88-74.83) | p=0.3217  34.39 (33.38-56.39) vs 50.90 (30.88-74.83) |
| **Peroxynitrite** | p=0.2807  3.584 (1.128-6.738) vs 4.965 (2.459-7.556) | p=0.8129  6.302 (3.111-10.76) vs 6.357 (3.737-12.49) | p=0.0690  4.965 (1.128-8.237) vs 3.341 (2.446-5.976) | p=0.5444  6.587 (3.111-11.34) vs 4.665 (3.737-12.49) | p=0.7655  5.084 (1.128-8.237) vs 4.539 (2.459-7.556) | p=0.9451  6.101 (3.737-11.34) vs 6.302 (3.111-12.49) | p=0.9831  4.965 (1.128-7.260) vs 4.106 (2.459-8.237) | p=0.9494  6.147 (3.111-12.49) vs 7.066 (4.014-11.02) | p=0.5912  4.557 (1.128-8.237) vs 5.362 (4.198-5.976) | p=0.9714  6.147 (3.111-12.49) vs 6.357 (5.381-8.232) | p=0.9478  4.769 (1.128-7.260) vs 4.386 (2.459-8.237) | p=0.6784  6.302 (3.111-12.49) vs 6.175 (4.014-11.02) | ***p=0.0395***  8.232 (4.014-12.49) vs 5.919 (3.250-8.556) | p=0.2029  7.617 (3.111-12.49) vs 5.975 (3.737-6.872) | p=0.6124  5.992 (4.014-10.68) vs 6.357 (3.111-12.49) | p=0.8178  6.302 (3.250-11.02) vs 5.845 (4.111-12.49) | p=0.8508  6.357 (3.250-12.49) vs 5.975 (3.111-11.34) |
| **S-nitrosothiols** | p=0.9017  5.217 (4.609-5.826) vs 5.391 (4.609-6.609) | ***p=0.0469***  4.870 (4.696-6.435) vs 5.826 (5.304-7.478) | p=0.1587  5.391 (4.609-6.609) vs 4.609 (4.478-5.799) | p=0.9496  5.348 (4.696-10.96) vs 5.826 (4.696-7.391) | p=0.5678  5.826 (5.304-7.565) vs 5.174 (4.609-6.609) | p=0.7550  5.826 (4.696-10.96) vs 5.304 (4.870-7.478) | p=0.5993  5.304 (4.609-5.826) vs 5.391 (4.783-6.609) | 0.9510  5.348 (4.696-7.391) vs 5.217 (4.870-7.479) | p=0.3237  5.261 (4.696-7.478) vs 5.761 (4.870-10.96) | p=0.1345  5.348 (4.739-6.609) vs 6.043 (5.348-6.609) | p=0.7378  5.696 (4.609-7.565) vs 5.478 (4.783-6.609) | p=0.2191  5.826 (4.696-8.348) vs 6.522 (4.870-10.96) | p=0.1539  6.087 (4.870-7.478) vs 5.261 (4.696-6.435) vs | p=0.1024  6.609 (5.217-7.479 vs 5.261 (4.696-6.435) | ***p=0.0021***  4.870 (4.696-5.391) vs 6.348 (5.217-7.478) | p=0.1558  5.217(4.870-5.826) vs 6.348 (4.696-10.96) | p=0.7227  5.304 (4.696-7.748) vs 5.609 (4.696-10.96) |
| **Nitrotyrosine** | p=0.8292  61.72 (31.59-86.80) vs 62.36 (36.24-80.40) | ***p=0.0416***  68.00 (57.84-100.1) vs 80.21 (60.76-115.4) | p=0.7075  61.72 (31.59-86.80) vs 63.29 (61.22-79.33) | ***p=0.049***  78.65 (57.84-115.4) vs 68.94 (63.23-71.36) | p=0.1910  67.41 (52.58-82.28) vs 61.55 (31.59-86.80) | p=0.6300  72.80 (63.23-89.92) vs 75.46 (57.84-115.4) | p=0.6567  61.72 (52.58-86.80) vs 66.50 (31.59-83.07) | ***p=0.03***  72.19 (61.55-98.83) vs 87.78 (60.76-115.4) | p=0.7473  62.59 (31.59-86.60) vs 61.22 (56.84-83.07) | p=0.2101  77.35 (57.84-115.4) vs 68.94 (62.40-74.43) | p=0.3481  63.29 (52.58-86.80) vs 61.55 (31.59-83.07) | p=0.8443  75.46 (61.55-115.4) vs 76.85 (57.84-111.1) | ***p=0.043***  82.38 (57.84-115.4) vs 66.74 (60.76-84.90) | p=0.3134  75.46 (61.55-115.4) vs 68.94 (57.84-98.83) | ***p=0.0057***  69.55 (61.55-89.92) vs 83.63 (60.76-115.4) | ***p=0.0270***  68.94 (60.76-89.92) vs 82.38 (57.84-111.1) | p=0.2041  76.65 (67.07-111.1) vs 72.94 (57.84-115.4) |

**Legends:** FRAP – ferric reducing antioxidant power, PC – protein carbonyls, IMA – ischemia modified albumin, AGE - advanced glycation end products, 8-OHDG - 8-hydroxydeoxyguanosine, MPO - myeloperoxidase, NO – nitric oxide. Bold and red text shows statistical significance.


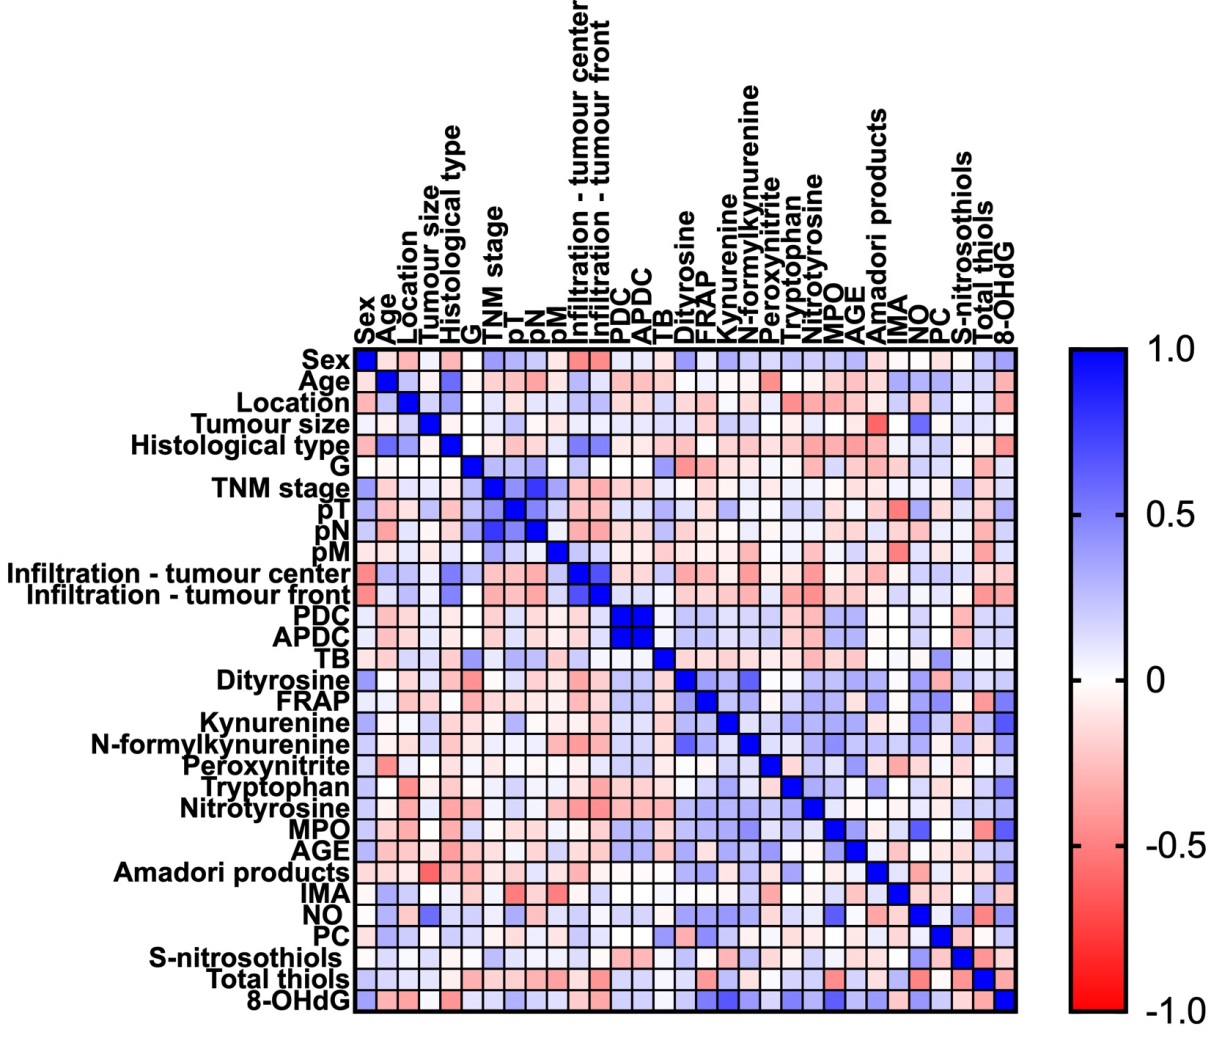


**Figure S1.** Heat map of oxidative and nitrosative stress and clinical and pathological parameters in the tumour tissue. Legends: G – degree of tumours differentiation, pT – depth of tumour invasion, pN – lymph node metastasis, pM – distant metastasis, PDC - poorly differentiated clusters , APDC - areas of poorly differentiated components, TB - tumour budding, FRAP – ferric reducing antioxidant power, PC – protein carbonyls, IMA – ischemia modified albumin, AGE - advanced glycation end products, 8-OHDG - 8-hydroxydeoxyguanosine, MPO - myeloperoxidase, NO -nitric oxide.
